# Supplementary material
Source: PubMed Central journal article supplement (PMC2677165)
Supplement: NIHMS4547-supplement-1.pdf [file NIHMS4547-supplement-1.pdf]

## Supplementary Figure 1

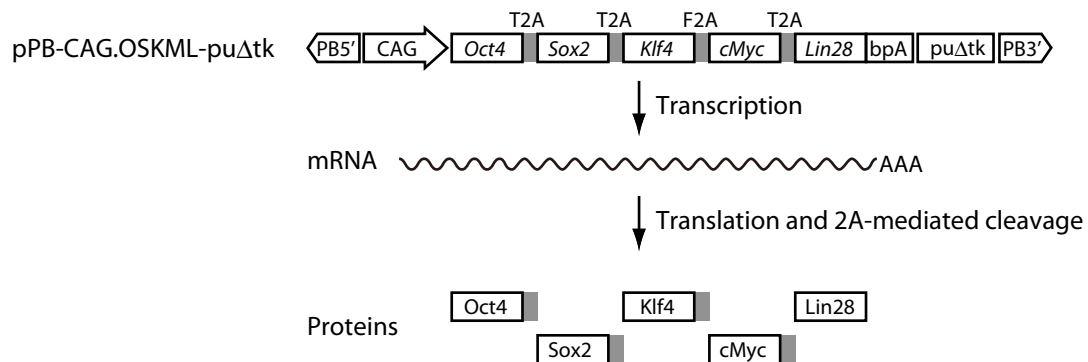

### **Supplementary Figure 1. 2A peptide-mediated polycistronic expression.**

Five genes linked by 2A peptide are transcribed into a single mRNA molecule. Polypeptides are co-translationally cleaved and release their N-terminal peptides fused with residual 2A peptide. Thus the molecular weights increase 2.5 kDa except C-terminal protein.

## Supplementary Figure 2

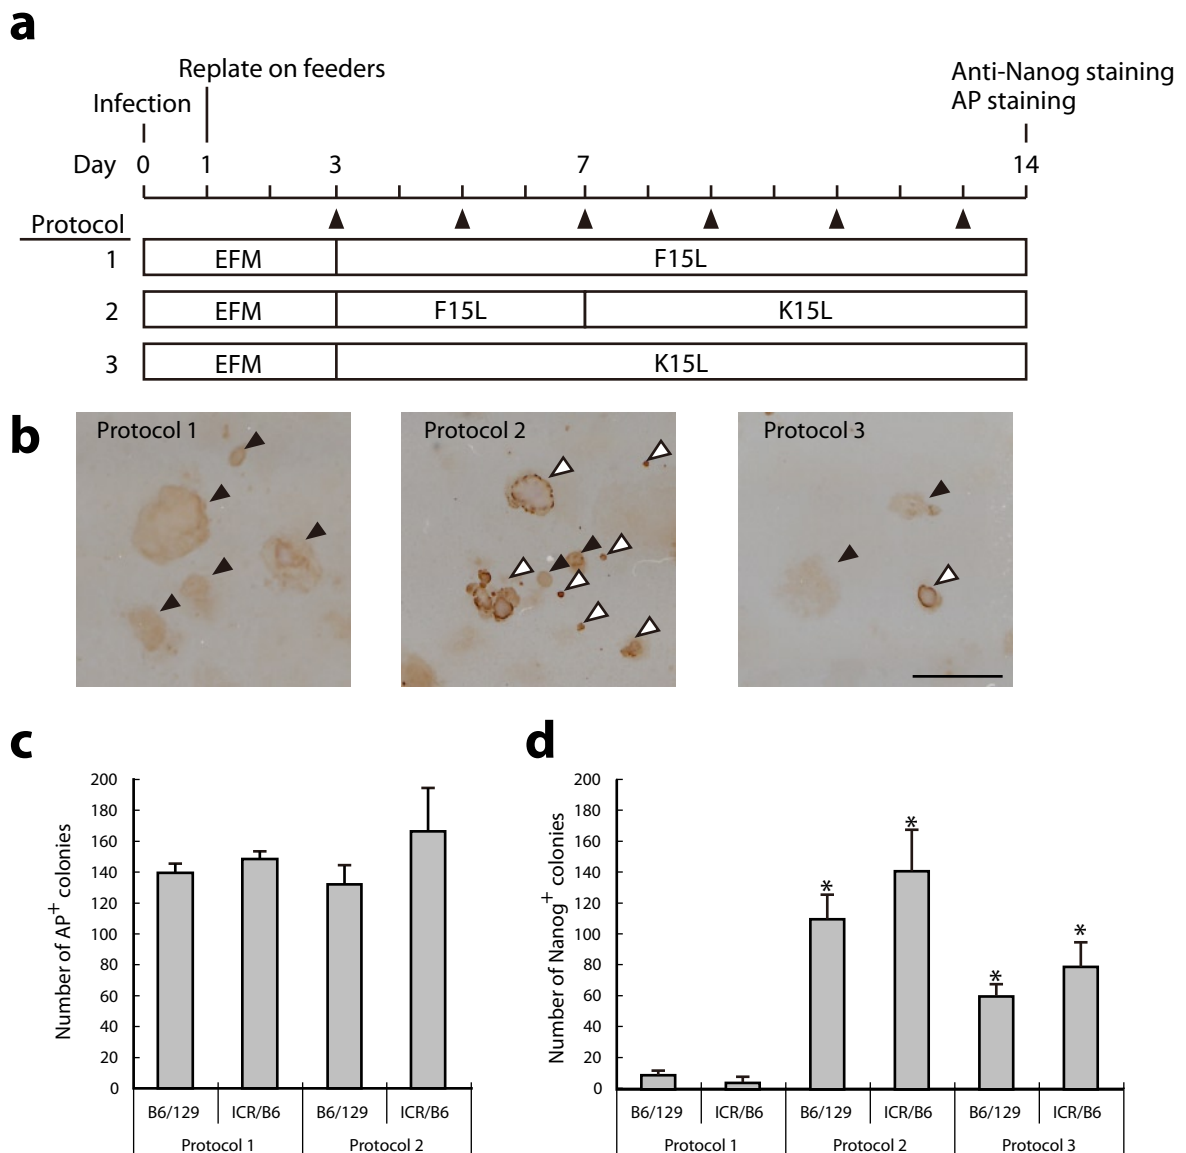

### Supplementary Figure 2. Enhancement of reprogramming by combination of serum-based and serum-free media.

(a) Time schedules of medium change from serum-based medium to serum-free medium. On day 0, MEFs were infected by a mixture of retroviruses carrying the four factors individually. Next day, infected MEFs were replated onto feeders. Cells were cultured with ESC medium between day 3 to day 14. In protocol 1 and 3, serum-based and serum-free medium was used for the entire period, respectively. In protocol 2, serum-based medium was used until day 7 and then switched to the serum-free medium. Triangles, medium changes; EFM, embryonic fibroblast medium; F15L, serum-based ESC medium; K15L, serum-free ESC medium. (b) Immunocytochemistry of iPSC colonies. On day 14, colonies were fixed and immunostained with anti-Nanog followed by chromogenic detection with DAB. Open and closed arrowheads, positive and negative for staining, respectively. Due to overdevelopment, even negative colonies show light brown. (c, d) The numbers of AP-positive and Nanog-positive colonies, respectively. Data are shown as mean  $\pm$  s.d. ( $n=3$ ). \*,  $p<0.05$  (Student's *t* test compared to protocol 1). Scale bar, 5mm

## Supplementary Figure 3

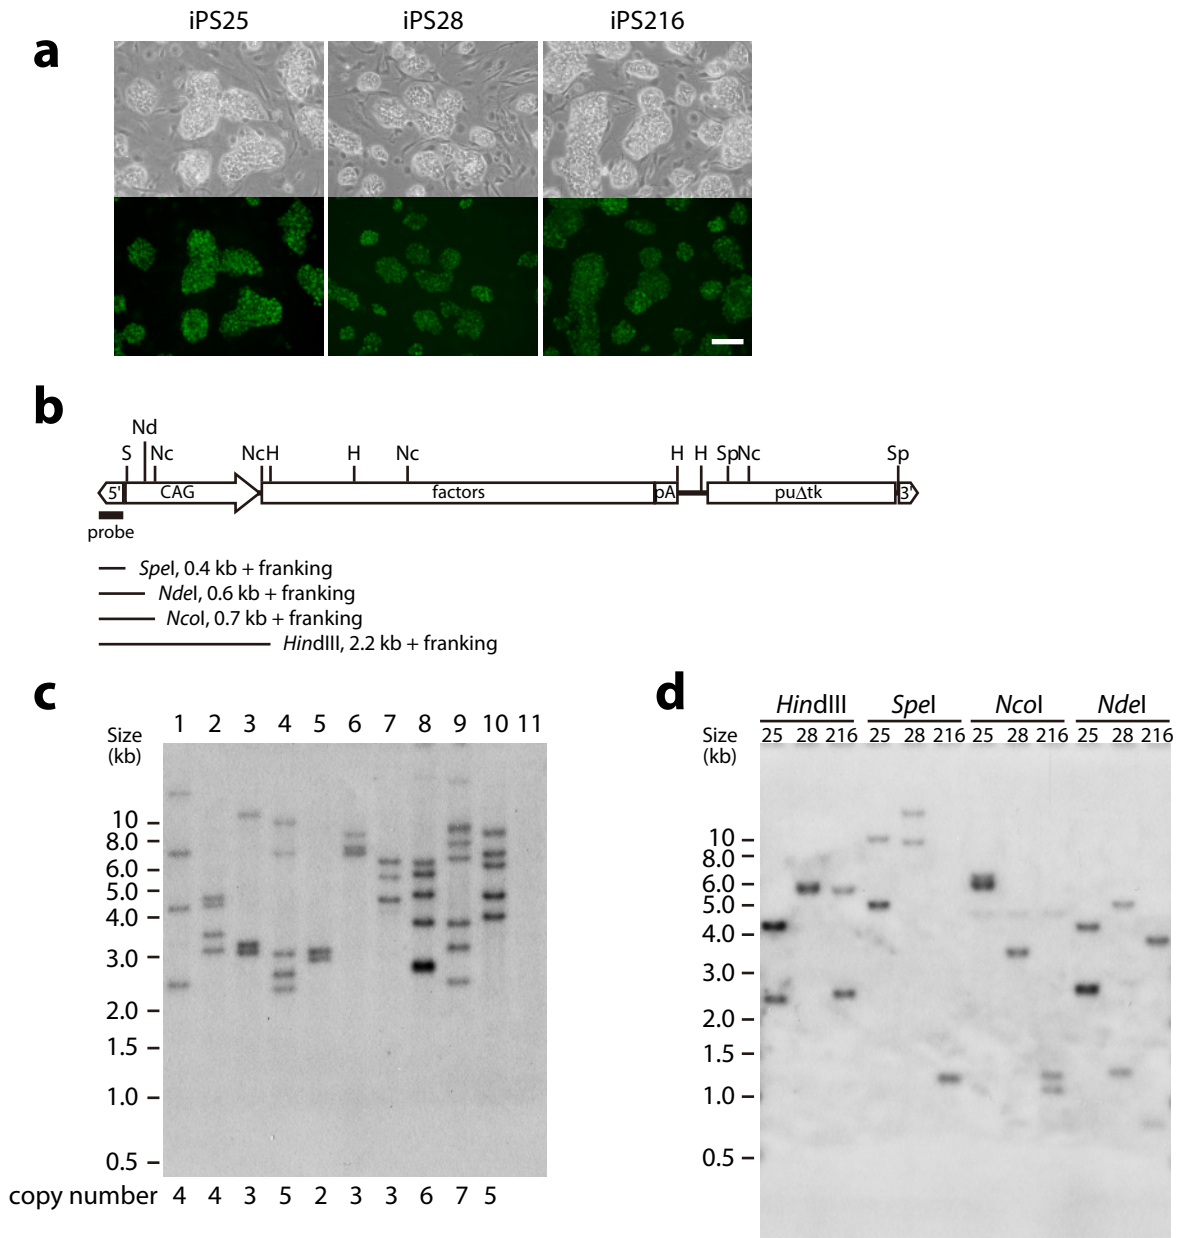

### Supplementary Figure 3. Characterization of primary iPSCs reprogrammed by the *piggyBac* transposon system.

(a), Immunostaining of Nanog in primary iPSC lines. They are morphologically indistinguishable from ESCs and express endogenous Nanog uniformly. Top, phase contrast image; bottom, Nanog immunostaining. (b) Restriction enzyme map of the reprogramming transposon vector. A thick line represents a probe for Southern blot analysis. (c) A representative result of Southern blot analysis of primary iPSCs. Genomic DNAs were digested with *Hind*III and hybridized with the 5' terminal repeat of the *piggyBac* transposon. Lane 1-7, primary iPSCs generated by transfection of 2.0  $\mu$ g of OSKM\* transposon and 2.0  $\mu$ g of *piggyBac* transposase-expressing plasmid. Lane 8-10, primary iPSCs generated by transfection of 4 factors carried by transposon individually together with the *piggyBac* transposase-expressing plasmid. Lane 11, *piggyBac* transposon-free mouse genomic DNA as a negative control. The copy numbers of integrated transposon were shown under each lane. (d) Detailed Southern blot analysis of 3 primary iPSC clones with 2-copy integration. Genomic DNAs were digested with different restriction enzymes and hybridized with the 5' terminal repeat of the *piggyBac* transposon. In all lanes, there were no more than 3 bands, indicating that these clones had 2 transposon copies. Scale bar, 100  $\mu$ m

## Supplementary Figure 4

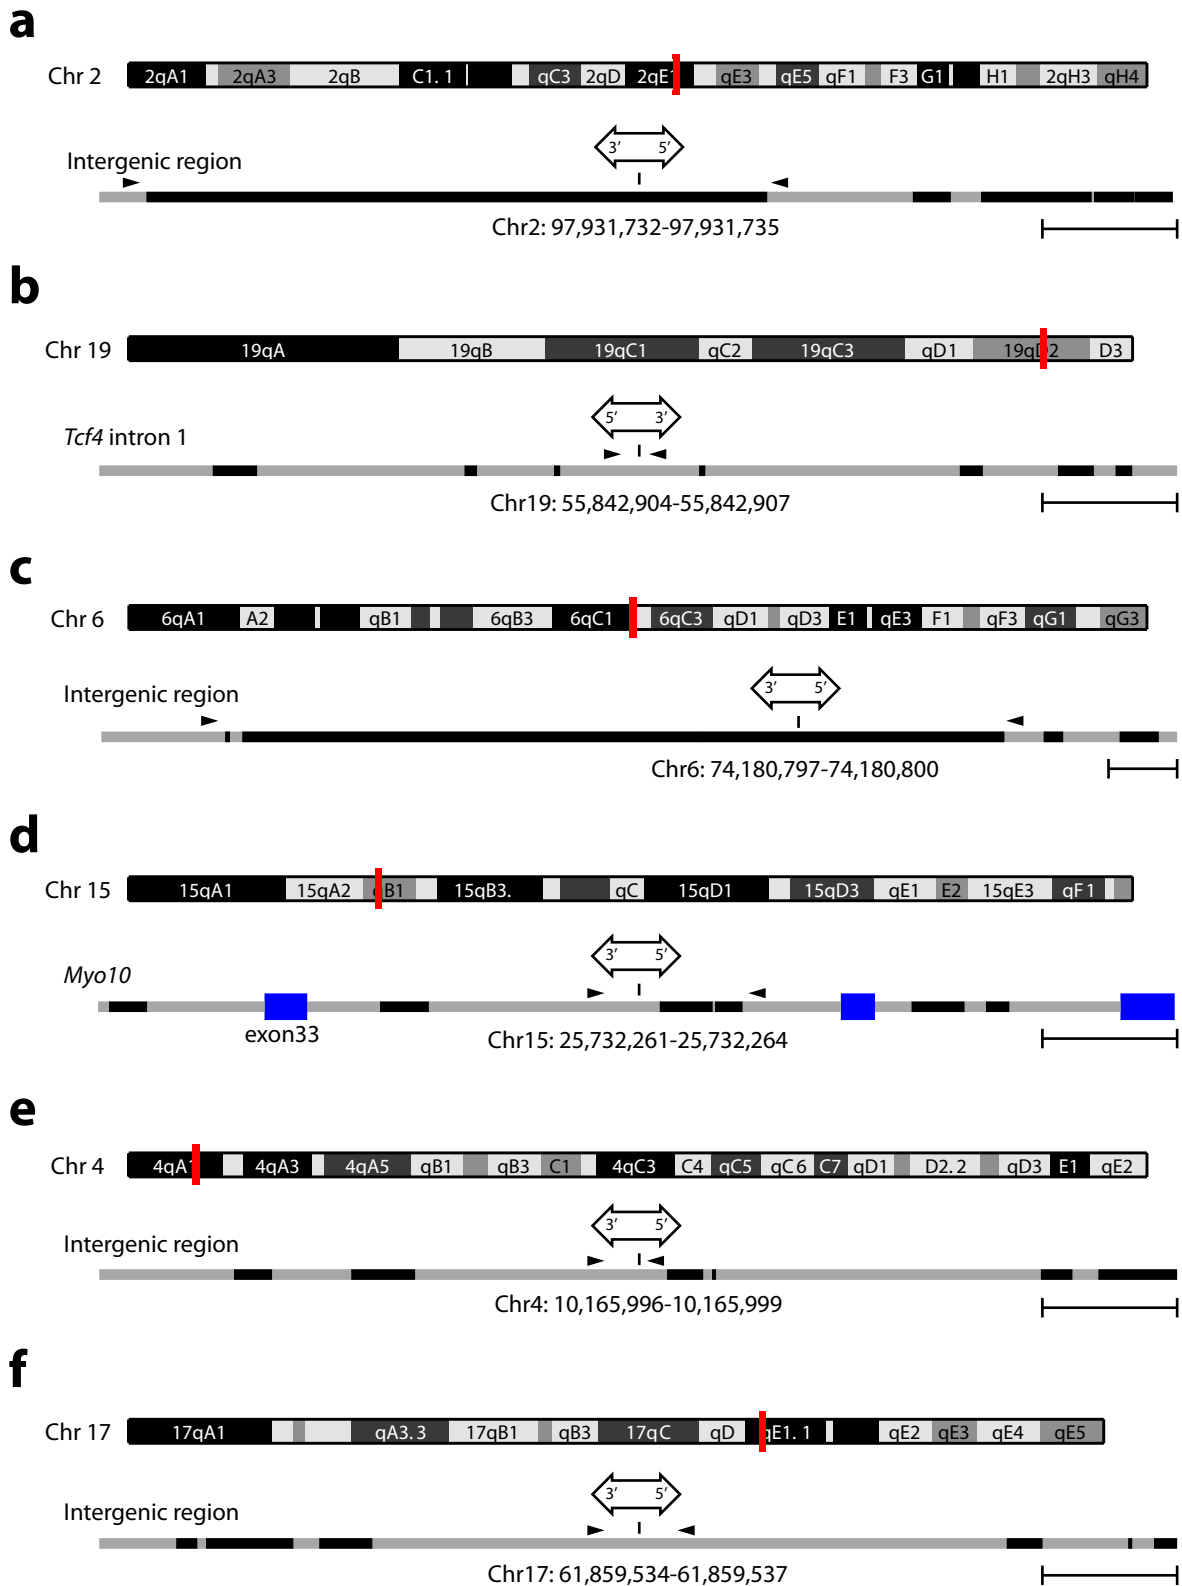

### Supplementary Figure 4. Transposon integration sites of 3 selected primary iPSC lines.

(a, b) Integration site 1 and 2 of iPS25. (c, d) Integration site 1 and 2 of iPS28. (e, f) Integration site 1 and 2 of iPS216. Gray and black lines show non-repetitive and repetitive sequences, respectively. Blue box, exon; Arrowheads, integration site-specific primers used in **Figure 3c-e**. The numbers under each line indicate positions of TTAA sequences, which are the target site of the *piggyBac* transposon (based on UCSC July 2007 assembly). Scale bar, 500 bp

## Supplementary Figure 5

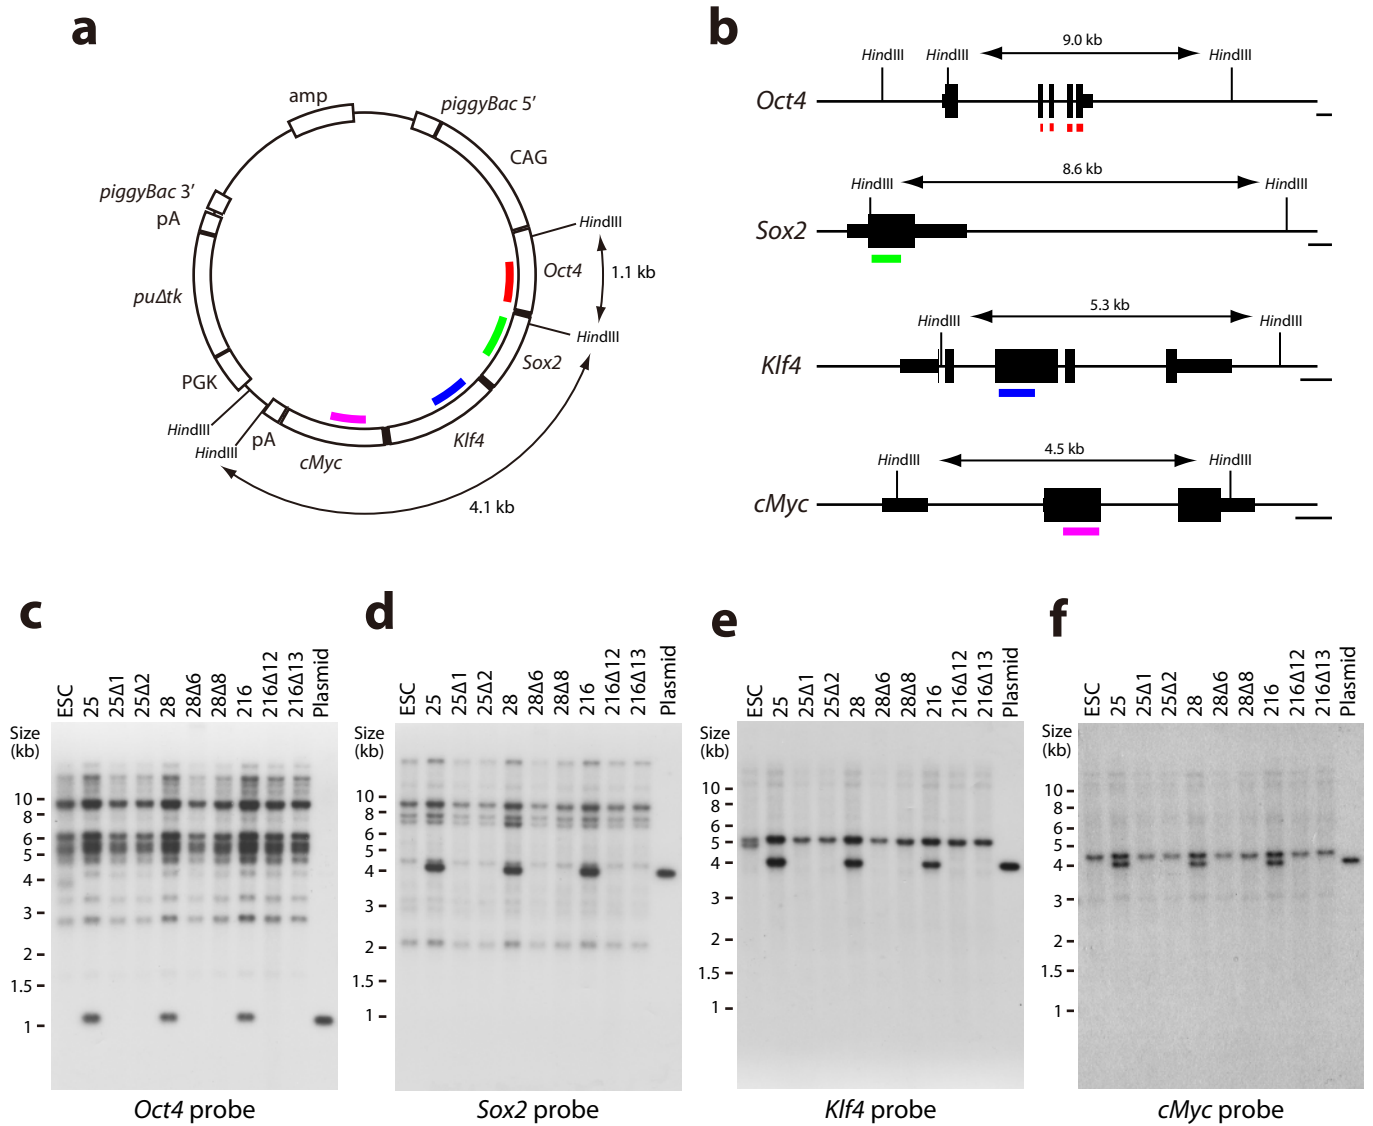

### Supplementary Figure 5. Southern blot analyses on integration-free iPSC genomes using probes against different parts of the transgene.

(a) Positions of probes (thick lines) used for Southern blot analyses. (b) Restriction maps of the endogenous loci of the 4 genes. (c-f) Southern blot analyses. Genomic DNAs were digested by *Hind*III and hybridized with probes shown in (a). Transgenes were detected in primary iPSC lines (iPS25, 28, and 216), but not in integration-free iPSC lines (iPS25Δ1, 25Δ2, 28Δ6, 28Δ8, 216Δ12, and 216Δ13), further proving transposon removal together with Southern blot analysis using the 5' terminal repeat probe shown in **Figure 3b**. Note that the control ESC line used has a B6129F1 background. In Oct4 and Klf4, polymorphisms can be seen. Scale bar, 500 bp

## Supplementary Figure 6

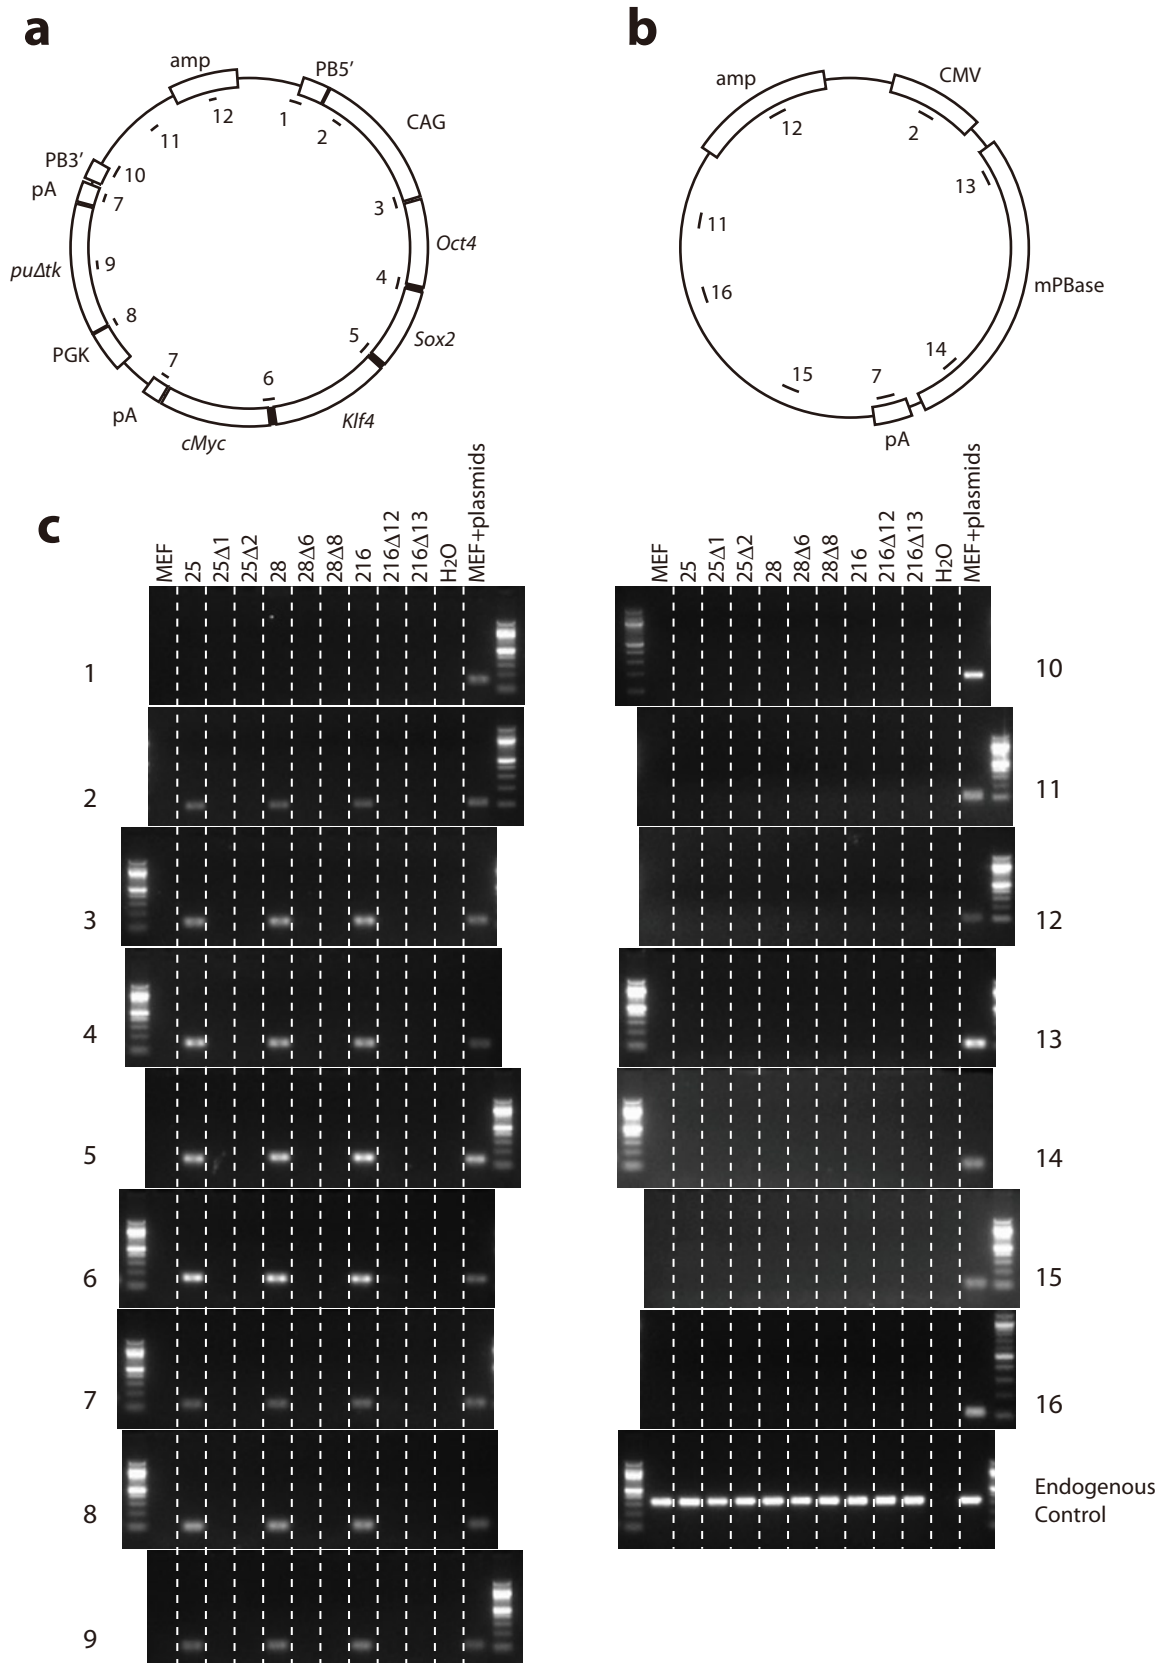

### Supplementary Figure 6. PCR analysis of vector integration in integration-free iPSCs.

(a, b) Positions of PCR amplicons in the reprogramming transposon and the *piggyBac* transposase expression vectors, respectively. (c) PCR results indicating that there is no evidence of random integration derived from both transposon and transposase expression vectors. As a positive control, both plasmids were spiked into MEF genomic DNA at levels designed to simulate single-copy integration per genome.

## Supplementary Figure 7

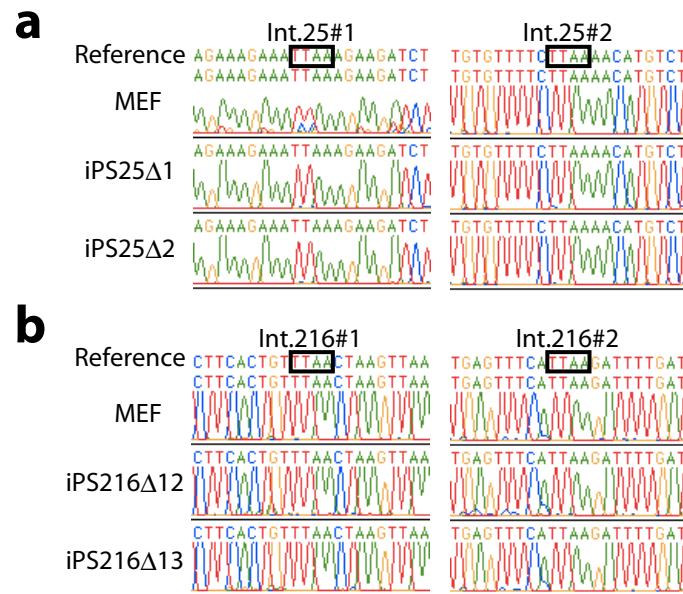

### Supplementary Figure 7. Footprint analysis by sequencing.

(a) Integration sites of iPS25-derived lines. (b) Integration site of iPS216-derived lines. Reference sequence is the C57Bl/6J genome. Sequences in transposon-free iPSC lines were identical to corresponding sequences of MEFs, indicating the perfect repair after transposon excision. TTAA target sites are boxed.

## Supplementary Figure 8

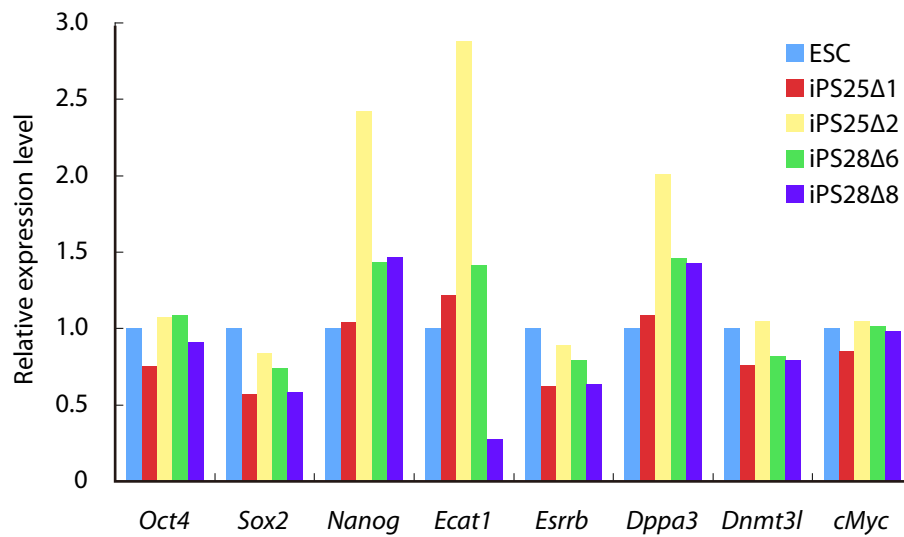

### Supplementary Figure 8. Quantitative RT-PCR analyses of ESC-specific genes in integration-free iPSCs.

Expression levels of ESC-specific genes were normalized to *Gapdh*. Expression levels in iPSCs were compared to levels in ESCs.



## Supplementary Figure 9

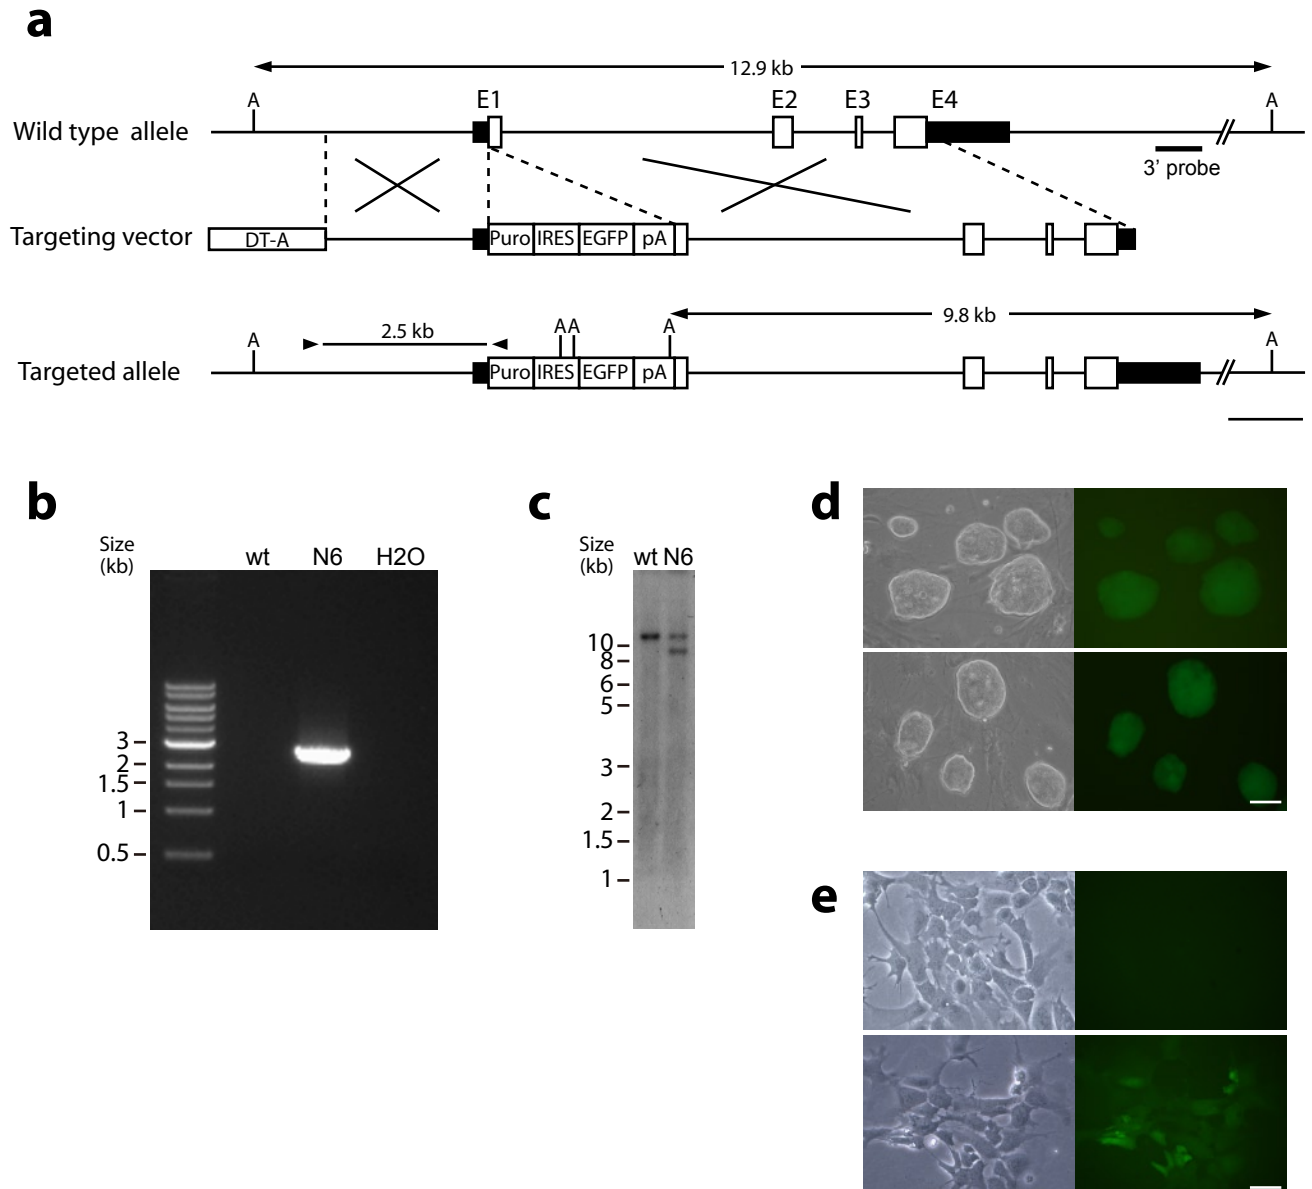

### Supplementary Figure 9. Targeting a puro-IRES-eGFP cassette into the *Nanog* locus.

(a) Schematic representation of gene targeting. A puro-IRES-eGFP cassette was knocked-in upstream of the translation initiation codon. Arrowheads, a primer pair to detect homologous recombination. A, *Afl*III sites. (b, c) Homologous recombination was verified by PCR across the 5' homologous arm (b) and by Southern blot analysis using a 3' external probe (c). (d) GFP expression in self-renewing iPSCs. Top, knock-in cell line, N6, derived from iPS25Δ1. Bottom, iPS25Δ1-derived cell line, U6, expressing GFP from a ubiquitous promoter. (e) Differentiation induced by all-*trans*-retinoic acid. At day 3, GFP expression was erased in the line N6 (top), whereas GFP was continuously expressed in the line U6 (bottom), indicating normal regulation of the *Nanog* promoter in cured iPSCs. Scale bars, 1 kb (a), 50 μm (d,e)

Supplementary Table 1. Summary of blastocyst injections

| Cell line            | Embryos transferred | Chimerism at e10.5 <sup>3</sup> | Contribution to gonad at e12.5 <sup>4</sup> | Live pups | GFP chimerism  |
|----------------------|---------------------|---------------------------------|---------------------------------------------|-----------|----------------|
| 25Δ1-U6 <sup>1</sup> | 12                  | 7/8                             | n/a                                         | n/a       | n/a            |
|                      | 12                  | n/a                             | n/a                                         | 2         | 0              |
|                      | 10                  | n/a                             | n/a                                         | 2         | 1 <sup>5</sup> |
|                      | 12                  | n/a                             | n/a                                         | 0         | 0 <sup>6</sup> |
| 25Δ1-N6 <sup>2</sup> | 10                  | n/a                             | 1/7                                         | n/a       | n/a            |
|                      | 10                  | n/a                             | n/a                                         | 5         | 1 <sup>6</sup> |
|                      | 10                  | n/a                             | n/a                                         | 4         | 1 <sup>6</sup> |

<sup>1</sup> iPS25Δ1-derived line with ubiquitous expression of eGFP

<sup>2</sup> iPS25Δ1-derived line in which eGFP has been knocked-in into the *Nanog* locus

<sup>3</sup> Number of GFP-positive chimeric embryos / total embryos

<sup>4</sup> Number of chimeric embryo with GFP-positive gonad / total embryos

<sup>5</sup> Genotyped by GFP primers and observation under the fluorescent stereomicroscope

<sup>6</sup> Genotyped by GFP primers

n/a, Not applicable

Supplementary Table 2. Oligonucleotides used in this study

F2A-linked 4-factor vector construction

|            |                                                                                                            |
|------------|------------------------------------------------------------------------------------------------------------|
| Oct4-B-U1  | CGGGATCCACCATGGCTGGACACCTGGCTTC                                                                            |
| Oct4-F2A-S | ACGCGTCGACGGGCCCTGGGTTGGACTCCACGTCTCCCGCCAACTTGAGAAGGTC<br>AAAATTCAACAGCTGTTTTCCGCTGCCGTTTGAATGCATGGGAGAGC |
| Sox2-X     | CTCGAGATGTATAACATGATGGAGAC                                                                                 |
| Sox2-F2A-S | GTCGACGGGCCCTGGGTTGGACTCCACGTCTCCCGCCAACTTGAGAAGGTCAAAA<br>TTCAACAGCTGTTTTCCGCTGCCCATGTGCGACAGGGGCAGTG     |
| Klf4-X     | CTCGAGATGGCTGTGACGACGCTCT                                                                                  |
| Klf4-F2A-S | GTCGACGGGCCCTGGGTTGGACTCCACGTCTCCCGCCAACTTGAGAAGGTCAAAA<br>TTCAACAGCTGTTTTCCGCTGCCAAAGTGCCTCTTCATGTGTA     |
| Myc-X      | CTCGAGATGCCCTCAACGTGAACTT                                                                                  |
| Myc-S      | GTCGACTCATGCACCAGAGTTTCAAGCT                                                                               |

Oct4-T2A-Sox2 modification

|           |                                                                                                                 |
|-----------|-----------------------------------------------------------------------------------------------------------------|
| OctT2ASox | CCAATGCATTCAAACGGCGCGGGTCCGGAGGAGAGGGCAGAGGAAGTCTTCTAA<br>CATGCGGTGACGTGGAGGAGAATCCTGGCCCAATGTATAACATGATGGAGACG |
| OtS-seqL  | GCCCTGCTGCGAGTAGGACATGCTG                                                                                       |

Sox2-T2A-Klf4 modification

|        |                                                                             |
|--------|-----------------------------------------------------------------------------|
| StK-U1 | GCAACGGCAGCTACAGCATGATGCAG                                                  |
| StK-U2 | CAGAGGAAGTCTTCTAACATGCGGTGACGTGGAGGAGAATCCTGGCCCAATGGCTG<br>TCAGCGACGCTCTGC |
| StK-L1 | CAGGAGGTCGTTGAACTCCTCGGTCTC                                                 |
| StK-L2 | ACCGCATGTTAGAAGACTTCTCTGCCCTCTCTCCGGACCCGCCGCCATGTGCG<br>ACAGGGGCAGTGTGCCG  |

Lin28 cloning

|       |    |                                     |
|-------|----|-------------------------------------|
| Lin28 | U1 | CGGGATCCACCATGGGCTCGGTGTCCAACCAGCAG |
|       | L1 | GGAATTCTCAATTCTGGGCTTCTGGGAGCAG     |

Linking Lin28 to the 4-factor cassette

|     |    |                                                         |
|-----|----|---------------------------------------------------------|
| MtL | U1 | TCTAACATGCGGTGACGTGGAGGAGAATCCTGGCCCAATGGGCTCGGTGTCCAAC |
|     | L1 | ACTGATCGATCTCGAGTCAATTCTGGGCTTCTGGGAG                   |

pCAG-EBNXN construction

|             |   |                              |
|-------------|---|------------------------------|
| EBNXNlinker | U | AATTCAGATCTGCGGCCGCCGAGATGCA |
|             | L | TCTCGAGGGCGGCCGAGATCTG       |

pPB-UbC construction

|     |   |                                          |
|-----|---|------------------------------------------|
| UbC | U | CTAGCTAGCCTCGAGGGCCTCCGCGCCGGGTTTTGGCGCC |
|     | L | GGAATTCATGGATCCGTCTAACAAAAAGCCAAAAACGGC  |
| bpA | U | GGAATCCGACTGTGCCTTCTAGTTGCCAG            |
|     | L | GCGTCGACCCATAGAGCCCACCGCATCCCCAGC        |

Sex typing

|     |   |                               |
|-----|---|-------------------------------|
| Sry | F | TGGTGTGGTCCCGTGGTGAGAGGCACAAG |
|     | R | TAGCCCTCCGATGAGGCTGATATTTATAG |

Splinkerette-PCR

|                      |                                                                       |
|----------------------|-----------------------------------------------------------------------|
| Spl-top <sup>1</sup> | CGAATCGTAACCGTTTTCGTACGAGAATTCGTACGAGAATCGCTGTCCTCTCCAACGAG<br>CCAAGG |
| Spl-sau <sup>1</sup> | GATCCCTTGGCTCGTTTTTTTTTGCAAAAA                                        |
| Spl-blunt            | CCTTGGCTCGTTTTTTTTTGCAAAAA                                            |
| Spl-CG               | CGCCTTGGCTCGTTTTTTTTTGCAAAAA                                          |

Supplementary Table 2. (continued)

|                     |                               |
|---------------------|-------------------------------|
| Spl-P1 <sup>1</sup> | CGAATCGTAACCGTTCGTACGAGAA     |
| Spl-P2 <sup>1</sup> | TCGTACGAGAATCGCTGTCTCTC       |
| PB5-P1              | AAGCGGCGACTGAGATGTCCTAAATG    |
| PB5-P2              | GCGACGGATTCGCGCTATTTAGAAAG    |
| PB3-P1              | AAACCTCGATATACAGACCGATAAAACAC |
| PB3-P2              | CGTCAATTTTACGCATGATTATCTTTAAC |

Detection of transposon removal

|                                      |   |                                   |
|--------------------------------------|---|-----------------------------------|
| Transposon 1<br>(Sox2-Klf4 junction) | F | GCAACGGCAGCTACAGCATGATGCAG        |
|                                      | R | CAGGAGGTCGTTGAACTCCTCGGTCTC       |
| Transposon 2<br>(PGK promoter)       | F | GCGTCGACCGACTGTGCCTTCTAGTTGCCAGCC |
|                                      | R | GTTGGCGCCTACCGGTGGATGTGGAATGTG    |
| Endogenous<br>control                | F | GGGGCCTTCTGGGGGTAAAGTTCAGAACAC    |
|                                      | R | TGGCTGCCTGAGGGCAAGAGGGAAAGAATC    |

Southern blot probes to detect vector integration

|      |   |                           |
|------|---|---------------------------|
| Oct4 | F | AAGGAGCTAGAACAGTTTGCCAAGC |
|      | R | GGAAAAGGGACTGAGTAGAGTGTGG |
| Sox2 | F | GCGACCGGCGGCAACCAGAAGAACA |
|      | R | GGGTGCCCTGCTGCGAGTAGGACAT |
| Klf4 | F | CCGTCTGGGCTTCCTTTGCTAACAC |
|      | R | ACGGTGGCCACAGACCTGGAGAGTG |
| cMyc | F | GACGATGACGGCGGCGGTGGCAACT |
|      | R | GTCGCTGCTGGTGGTGGGCGGTGTC |

Detection of random integration of the plasmids

|                 |   |                                 |
|-----------------|---|---------------------------------|
| 1               | F | ACGACGTTGTA AACGACGGCCAGT       |
|                 | R | GCGACGGATTCGCGCTATTTAGAAAG      |
| 2 <sup>2</sup>  | F | TATCATATGCCAAGTACGC             |
|                 | R | TAGATGTA CTGCCAAGTAGGAA         |
| 3               | F | AGAGCCTCTGCTAACCATGTTTCATGCCTTC |
|                 | R | GAAGTCTGAAGCCAGGTGTCCAGCC       |
| 4               | F | CCCTCTGTTCCCGTCACTGCTCTG        |
|                 | R | GCTTCAGCTCCGTCTCCATCATGT        |
| 5               | F | CCATTAACGGCACACTGCCCTGT         |
|                 | R | AGGACGGGAGCAGAGCGTCGCTGA        |
| 6               | F | CCACCTTGCTTACACATGAAGAG         |
|                 | R | GAGTCGTAGTCGAGGTCATAGTTC        |
| 7               | F | TGCCACTCCCCTGTCCTTTCTTA         |
|                 | R | CCAATCCTCCCCCTTGCTGTCCTG        |
| 8               | F | CGTCTGCCGCGCTGTTCTCCTCTT        |
|                 | R | GTGGCGAGGCGCACCGTGGGCTTG        |
| 9               | F | CAGGTGCTGGGGGCTTCCGAGACA        |
|                 | R | TATCTGGGCGCTTGTCATTACCAC        |
| 10              | F | CGTCAATTTTACGCATGATTATCTTTAAC   |
|                 | R | ACACAGGAAACAGCTATGACCATGATTACG  |
| 11 <sup>2</sup> | F | GCCTTATCCGGTAACTATCGT           |
|                 | R | GCACCGCTACATACCTC               |
| 12 <sup>2</sup> | F | CCGATCGTTGTCAGAAGTAAGTTG        |
|                 | R | TCACAGAAAAGCATCTTACGGA          |
| 13              | F | GACGACGTGCAGTCCGACACCGAG        |
|                 | R | CTGCCGGGCTGCTCGATCACGTTT        |
| 14              | F | ACAGCCACAACGTGAGCAGCAAGG        |
|                 | R | GGGGCCTCCAGCCTCTTCTCAT          |
| 15              | F | TTCTGTGGAATGTGTGTCAGTTAG        |
|                 | R | GGGGACTTTCCACACCTGGTTGCT        |

Supplementary Table 2. (continued)

|                    |   |                                |
|--------------------|---|--------------------------------|
| 16                 | F | CGGGGAGAGGCGGTTTGCCTATTG       |
|                    | R | GTATTACCGCCTTTGAGTGAGCTG       |
| Endogenous control | F | GGGGCCTTCTGGGGGTAAAGTTCAGAACAC |
|                    | R | TGGCTGCCTGAGGGCAAGAGGGAAAGAATC |

## Transposon excision analysis

|               |   |                            |
|---------------|---|----------------------------|
| iPS25-site 1  | L | TCTGGCCTATTTTAGAGCATAATAC  |
|               | R | AAGAAAGCATGGCCTTCATGGAGCTG |
| iPS25-site 2  | L | AGGAAGCCGCAGTTACACGCCACAG  |
|               | R | CCAAGGAAGGAGACCACCTCATCAC  |
| iPS28-site 1  | L | ATAGAATAGAGGGACACTGAATATC  |
|               | R | CAGGCCAGTGGATCACTGTAACCTAC |
| iPS28-site 2  | L | TGCCAGCCTCCAGCGAGTGTTGTTG  |
|               | R | TGCCATCAATCGTGGGATCTCCAAG  |
| iPS216-site 1 | L | ATGCTGGCTGTGCTTGTCTATGTC   |
|               | R | TGAGTAACCCAGGTAATTCTGATTC  |
| iPS216-site 2 | L | AAGAATTCATTTGCTTGGGACTCTG  |
|               | R | ACTGCACAGAAGTTCCCTACTGGT   |

## RT-PCR analysis

|               |   |                                |
|---------------|---|--------------------------------|
| <i>Oct4</i>   | F | CCTGGAATCGGACCAGGCTCAGAGGTATTG |
|               | R | ATTGTTGTCGGCTTCTCCACCCACTTCTC  |
| <i>Sox2</i>   | F | AGCTACGCGCACATGAACGGCTGGAGCAAC |
|               | R | TGGAGCTGGCCTCGGACTTGACCACAGAGC |
| <i>Nanog</i>  | F | CCACAGTTTGCCTAGTTCTGAGGAAGCATC |
|               | R | TACTCCACTGGTGCTGAGCCCTTCTGAATC |
| <i>Ecat1</i>  | F | CGTGGAACTCGGCTACTGGAAATC       |
|               | R | GCCGCCATACGACGACGCTCAACTC      |
| <i>Esrrb</i>  | F | AACCTGCCGATTTCCCCACCTGCTA      |
|               | R | GGCTCATCTGGTCCCAAGTGTCAG       |
| <i>Dppa3</i>  | F | GAGGACGCTTTGGATGATACAGACG      |
|               | R | CAACAAAGTGCGGACCCTTCTCTTG      |
| <i>Dnmt3l</i> | F | CCCTCTTCTGTATGATGATGATGG       |
|               | R | CCTCTGCAGCAGTCCACTCCGTGAG      |
| <i>cMyc</i>   | F | GCCGCGTCCGAGTGCATTGACCCCTCAGTG |
|               | R | TTGGCCCTCTTGGCAGCTGGATAGTCCTTC |
| <i>Actb</i>   | F | CAGGGTGTGATGGTGGGAATGGGTGAGAAG |
|               | R | TACGTACATGGCTGGGGTGTGAAGGTCTC  |
| <i>Gapdh</i>  | F | CCTCCGTTTCTACCCCAATG           |
|               | R | GGAGACAACCTGGTCTCAGTGTA        |

## Bisulphite sequencing

|                           |   |                                |
|---------------------------|---|--------------------------------|
| <i>Oct4</i> <sup>3</sup>  | F | GGTTTTTtagaggatggttgagtg       |
|                           | R | TCCAACCCTACTAACCCTCACC         |
| <i>Nanog</i> <sup>3</sup> | F | GATTTTGTAGGTGGGATTAATTGTGAATTT |
|                           | R | ACCAAAAAAACCACACTCATATCAATATA  |

## Detection for Nanog-puro-IRES-GFP targeting

|                |   |                                |
|----------------|---|--------------------------------|
| Nanog-puro     | F | TAAACAGTGGGTCTGAAGCCTTCGAGGGAG |
|                | R | GCGAGGCGCACCGTGGGCTTGTACTCGGTC |
| Nanog 3' probe | F | CCCAGCTGCAGCTTTCAGAGGCTTT      |
|                | R | TGTTTTACTCATGTGCATGGGCTGG      |

## Chimera genotyping

|                  |   |                           |
|------------------|---|---------------------------|
| GFP <sup>4</sup> | F | CTTGATCCGTTCTTCTGCTTGTGCG |
|                  | R | CACCCTCGTGACCACCCTGACCTAC |

Supplementary Table 2. (*continued*)

References

- 1, Devon, R.S. *et al.* Nucleic Acid Res 23, 1644-1645 (1995)
- 2, Okita *et al.* Science 322, 949-953 (2008)
- 3, Takahashi, K. & Yamanaka, S. Cell 126, 663-676 (2006)
- 4, Horie *et al.* PNAS 98, 9191-9196 (2001)
